# Supplementary material
Source: publisher figshare collection journal article supplement (https://acs.figshare.com/ndownloader/files/4010836)
Supplement: Supplementary file 1 [file 4010836]

## Supporting information

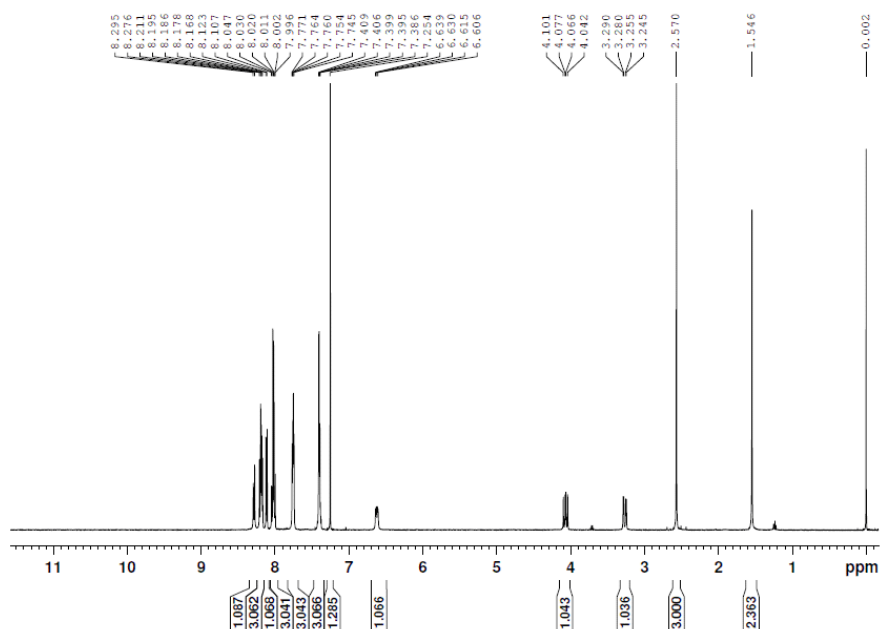

**Figure 1S.**  $^1\text{H}$  NMR spectrum of APPP.

Assignments of each H in the NMR spectrum:  $\delta$  (ppm) 2.57 (CO-CH<sub>3</sub>), 3.25-3.29 (one H of CH<sub>2</sub>), 4.04-4.10 (another H of CH<sub>2</sub>), 6.61-6.64 (CH), 7.39-8.30 (14H, Ar-H from pyrene and benzene rings).

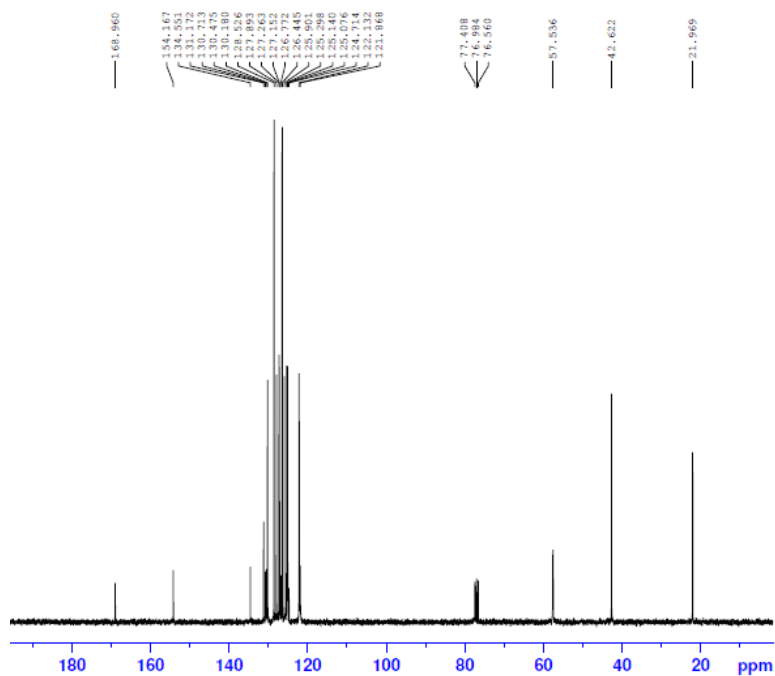

**Figure 2S.**  $^{13}\text{C}$  NMR spectrum of APPP.

Assignments of C in the NMR spectrum:  $\delta$  (ppm) 21.96 ( $\text{C}^*\text{-CO}$ ), 42.62 ( $\text{CH}_2$ ), 57.54 ( $\text{CH-N}$ ),

121.00-134.55 (the rest Ar-C from pyrene and benzene rings), 154.17 ( $\text{C=N}$ ), 168.96 ( $\text{C=O}$ ).

(21.96 is assigned to  $\text{C}^*$ ).

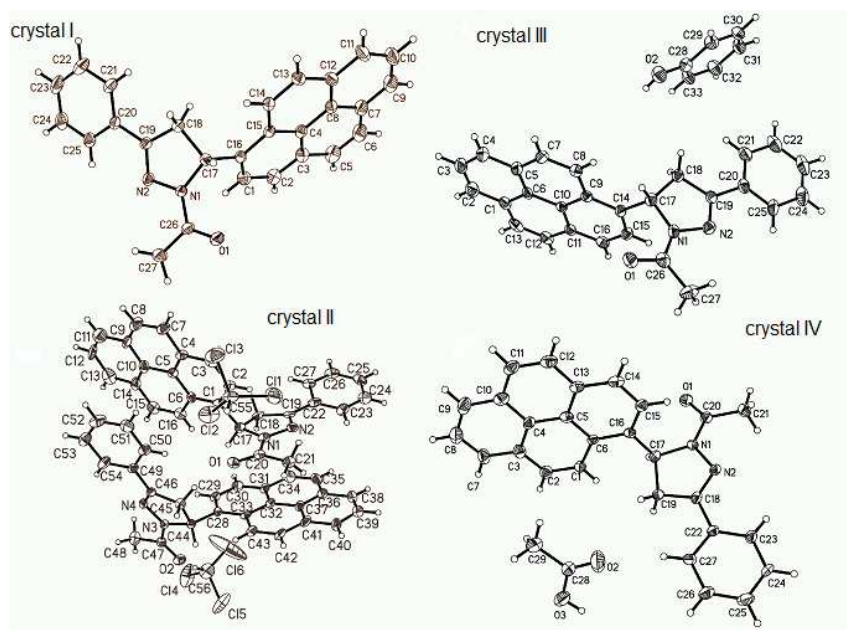

**Figure 3S** . Thermal ellipsoid plots of crystals I-IV (d) at 20% probability.

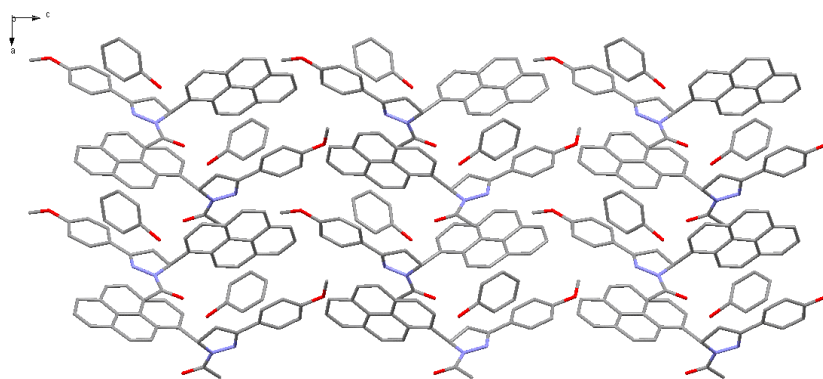

**Figure 4S** . 3D packing diagram of AMPP • phenol (projected in *ac* plane).

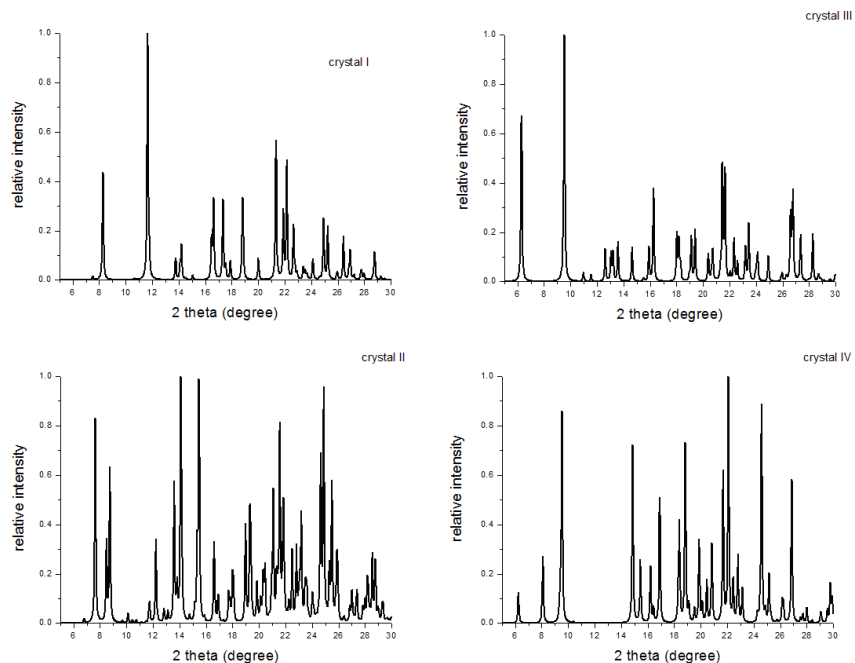

**Figure 5S.** The simulated PXRD patterns of crystals I-IV.

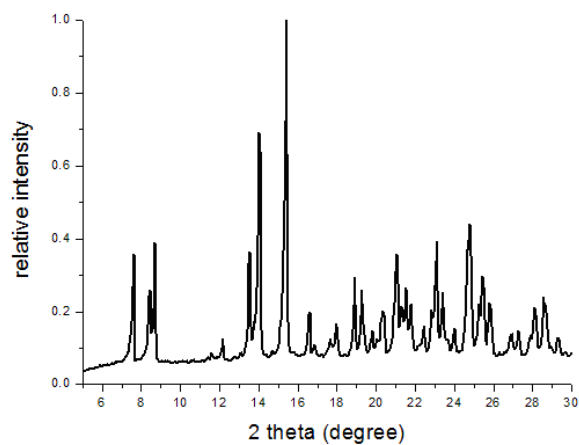

**Figure 6S .** PXRD pattern for the product of the transformation ( in chloroform and petroleum ether)

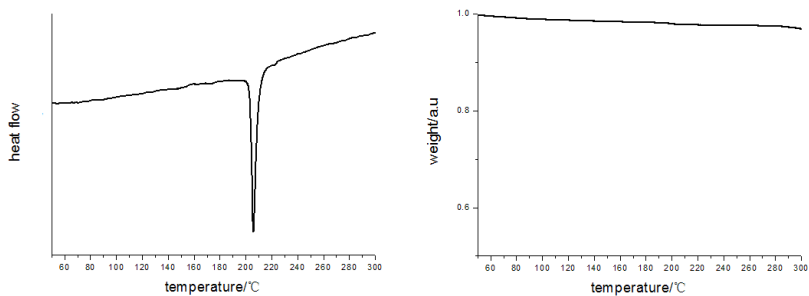

**Figure 7S** . DSC and TGA profiles of product after the transition (in methanol).

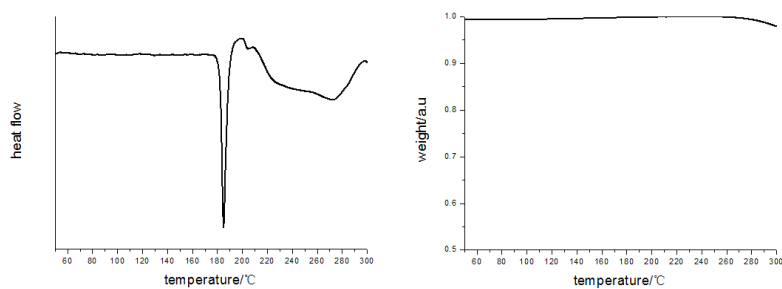

**Figure 8S** . DSC and TGA profiles of intermediate product during the transition (in methanol).

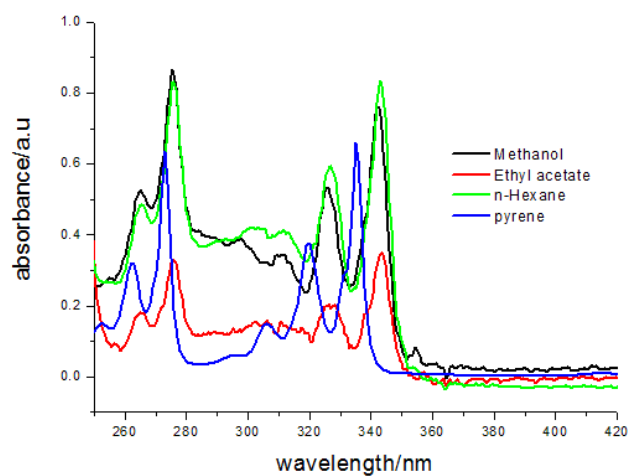

**Figure 9S** . UV-Vis spectra of AP PP in various solvents and pyrene.

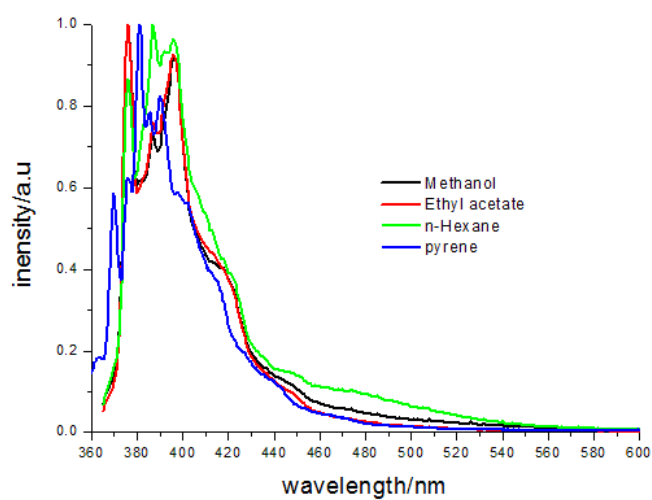

**Figure 10S**. Fluorescence spectra of AP PP in various solvents and pyrene ( $\lambda_{\text{ex}}$ =350 nm).

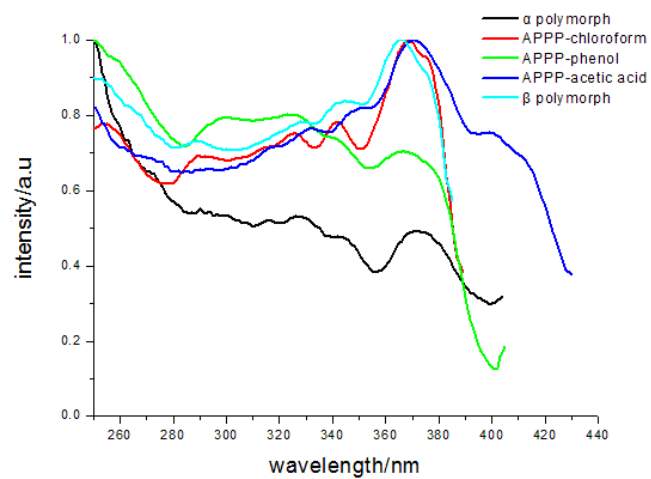

**Figure 11S.** Excitation spectra for the solids.

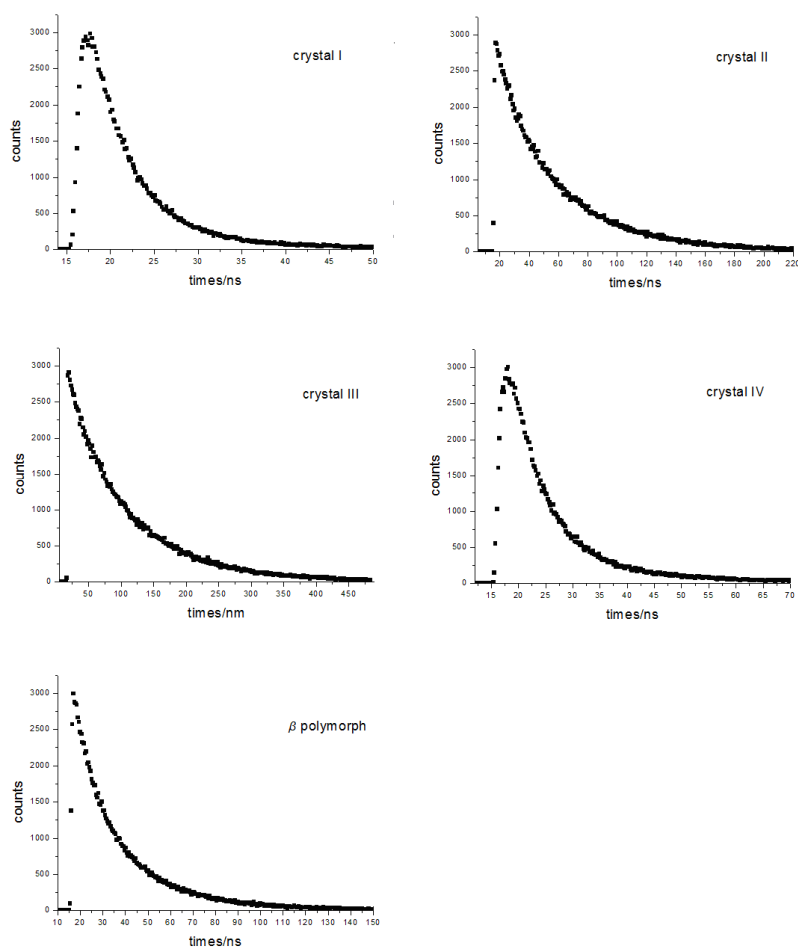

**Figure 12S.** Fluorescence decay curves for the solids (fluorescence lifetimes were monitored at

340 nm).
